# Supplementary material for: Safety Analysis of Extended Platelet Shelf-Life with Large-Volume Delayed Sampling on BACT/ALERT® VIRTUO® in Australia
Source: MDPI journal article supplement (doi:10.3390/microorganisms11092346), 2023-09-19

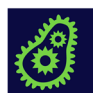

## Supplementary Materials

**Figure S1:** Percentages for time to detection (time ranges in hours) in culture bottles with a positive Gram stain or culture.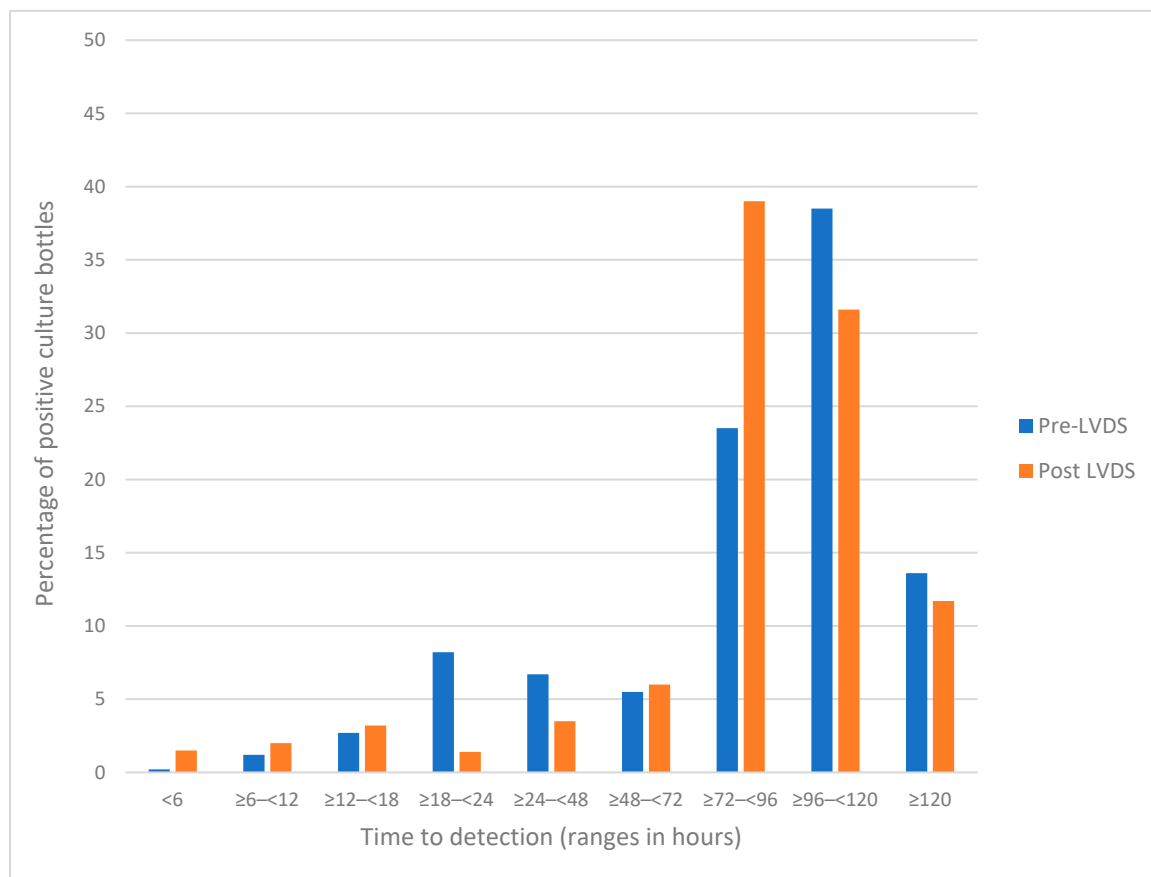**Table S1.** Pre-LVDS: number of organisms identified and the time to detection (time range in hours).

| Organism         |                                                                   | <6 | ≥6-<12 | ≥12-<18 | ≥18-<24 | ≥24-<48 | ≥48-<72 | ≥72-<96 | ≥96-<120 | ≥120 |
|------------------|-------------------------------------------------------------------|----|--------|---------|---------|---------|---------|---------|----------|------|
| Pathogenic       |                                                                   |    |        |         |         |         |         |         |          |      |
| Environment      | <i>Bacillus cereus</i>                                            | 1  |        | 4       |         |         |         |         |          |      |
| Skin             | <i>Staphylococcus aureus</i>                                      |    |        | 2       | 1       |         |         |         |          |      |
|                  | <i>Staphylococcus lugdunensis</i>                                 |    |        |         | 2       | 1       |         |         |          |      |
|                  | <i>Streptococcus dysgalactiae</i>                                 |    | 2      |         |         |         |         |         |          |      |
|                  | <i>Streptococcus pyogenes</i>                                     |    | 1      |         |         |         |         |         |          |      |
|                  | <i>S. dysgalactiae/S. pyogenes</i> <sup>1</sup>                   |    | 1      |         |         |         |         |         |          |      |
|                  | Group C streptococcus                                             |    | 1      |         |         |         |         |         |          |      |
|                  | <i>S. aureus</i> /Coagulase negative staphylococci <sup>1,2</sup> |    |        |         | 1       |         |         |         |          |      |
| Skin/urine       | <i>Staphylococcus saprophyticus</i>                               |    |        |         | 1       |         |         |         |          |      |
| Throat/lungs     | <i>Streptococcus pneumoniae</i>                                   |    |        | 5       |         |         |         |         |          |      |
| Throat/lungs/gut | <i>Klebsiella pneumoniae</i>                                      |    | 1      |         |         |         |         |         |          |      |
| Gut              | <i>Streptococcus agalactiae</i>                                   |    | 2      |         |         |         |         |         |          |      |
|                  | <i>Escherichia coli</i>                                           |    | 1      |         |         |         |         |         |          |      |
|                  | <i>Enterococcus faecalis</i>                                      |    |        | 3       |         |         |         |         |          |      |
|                  | <i>Bacteroides</i> spp.                                           |    |        |         | 1       |         |         |         |          | 1    |
|                  | <i>Fusobacterium</i> spp.                                         |    |        |         |         | 2       |         |         |          |      |
|                  |                                                                   |    |        |         |         |         |         |         |          |      |
| Opportunistic    |                                                                   |    |        |         |         |         |         |         |          |      |

|                   |                                                                                              |   |   |    |    |    |    |     |     |     |
|-------------------|----------------------------------------------------------------------------------------------|---|---|----|----|----|----|-----|-----|-----|
| Oral              | <i>Streptococcus parasanguinis</i>                                                           |   |   |    | 1  | 2  |    |     |     |     |
|                   | <i>Streptococcus mitis</i>                                                                   |   |   | 1  |    |    |    |     | 1   |     |
|                   | <i>Streptococcus oralis</i>                                                                  |   |   |    | 1  |    |    |     |     |     |
|                   | <i>Gemella haemolysans</i>                                                                   |   |   |    | 1  |    |    |     |     |     |
|                   | <i>Parvimonas micra</i>                                                                      |   |   |    |    |    |    | 1   |     |     |
| Urine             | <i>Aerococcus viridans</i>                                                                   |   |   |    | 1  |    |    |     |     |     |
| Gut               | <i>Finegoldia magna</i>                                                                      |   |   |    |    | 1  |    |     |     |     |
| Gut/environment   | <i>Serratia marcescens</i>                                                                   | 1 | 3 | 1  |    |    |    |     |     |     |
|                   | <i>Clostridium perfringens</i>                                                               |   | 1 |    |    |    |    |     |     |     |
| Low pathogenicity |                                                                                              |   |   |    |    |    |    |     |     |     |
| Skin              | <i>Cutibacterium</i> spp.                                                                    |   | 1 |    |    | 2  | 5  | 269 | 451 | 152 |
|                   | Coagulase negative staphylococci <sup>2</sup>                                                |   |   | 13 | 81 | 38 | 43 | 2   | 3   | 5   |
|                   | <i>Micrococcus</i> spp.                                                                      |   |   |    |    | 17 | 9  | 3   | 5   | 1   |
|                   | <i>Corynebacterium</i> spp.                                                                  |   |   |    |    | 1  | 1  | 7   | 3   | 4   |
|                   | <i>Kocuria</i> spp.                                                                          |   |   |    |    | 7  | 4  |     |     |     |
|                   | <i>Cutibacterium</i> spp./Coagulase negative staphylococci <sup>1,2</sup>                    |   |   |    | 2  |    |    | 2   | 1   |     |
|                   | <i>Lactococcus</i> spp.                                                                      |   | 1 |    |    |    |    | 1   |     |     |
|                   | <i>Dermacoccus barathri</i>                                                                  |   |   |    |    |    |    |     | 1   | 1   |
|                   | Unidentified Gram-positive cocci                                                             |   |   |    |    | 1  | 1  |     |     |     |
|                   | <i>Micrococcus</i> sp./ <i>Corynebacterium</i> spp. <sup>1</sup>                             |   |   |    |    |    | 1  |     |     |     |
|                   | <i>Streptococcus sanguinis</i> <sup>3</sup> /Coagulase negative staphylococci <sup>1,2</sup> |   |   |    | 1  |    |    |     |     |     |
|                   | <i>Bacillus</i> spp./ <i>Paenibacillus</i> spp. <sup>4</sup>                                 |   | 3 | 6  | 9  |    |    | 2   | 3   | 2   |
|                   | <i>Collinsella aerofaciens</i>                                                               |   |   |    |    | 1  |    |     | 1   |     |
|                   | <i>Dietzia</i> spp.                                                                          |   |   |    |    |    | 1  | 1   |     |     |
|                   | <i>Paecilomyces</i> spp.                                                                     |   |   |    |    |    |    |     | 1   | 1   |
| Environment       | <i>Pseudomonas stutzeri</i>                                                                  |   |   | 1  |    |    |    |     |     |     |
|                   | Unidentified Gram-positive bacilli                                                           |   |   |    |    |    | 1  |     |     |     |
|                   | <i>Virgibacillus proomii</i>                                                                 |   |   |    |    |    |    | 1   |     |     |
|                   | <i>Microbacterium</i> spp.                                                                   |   |   |    |    |    |    |     | 1   |     |
|                   | <i>Brevibacterium</i> spp.                                                                   |   |   |    |    |    |    |     |     | 1   |
|                   | <i>Streptococcus gallolyticus</i> <sup>3</sup>                                               |   | 1 |    |    |    |    |     |     |     |
|                   | <i>Micrococcus</i> spp./ <i>Brevibacterium</i> spp. <sup>1</sup>                             |   |   |    |    |    | 1  |     |     |     |
|                   | <i>Cutibacterium</i> spp./ <i>Pseudomonas aeruginosa</i> <sup>1</sup>                        |   |   |    |    |    |    |     | 1   |     |

<sup>1</sup> Multiple organisms identified. <sup>2</sup> Excluding *S. lugdunensis* and *S. saprophyticus*. <sup>3</sup> May be associated with risk of underlying donor related health conditions such as infective endocarditis or gastro-intestinal pathology. <sup>4</sup> Excluding *B. cereus*.

**Figure S2:** LVDS: percentages for the types of organisms identified and the time to detection (time range in hours).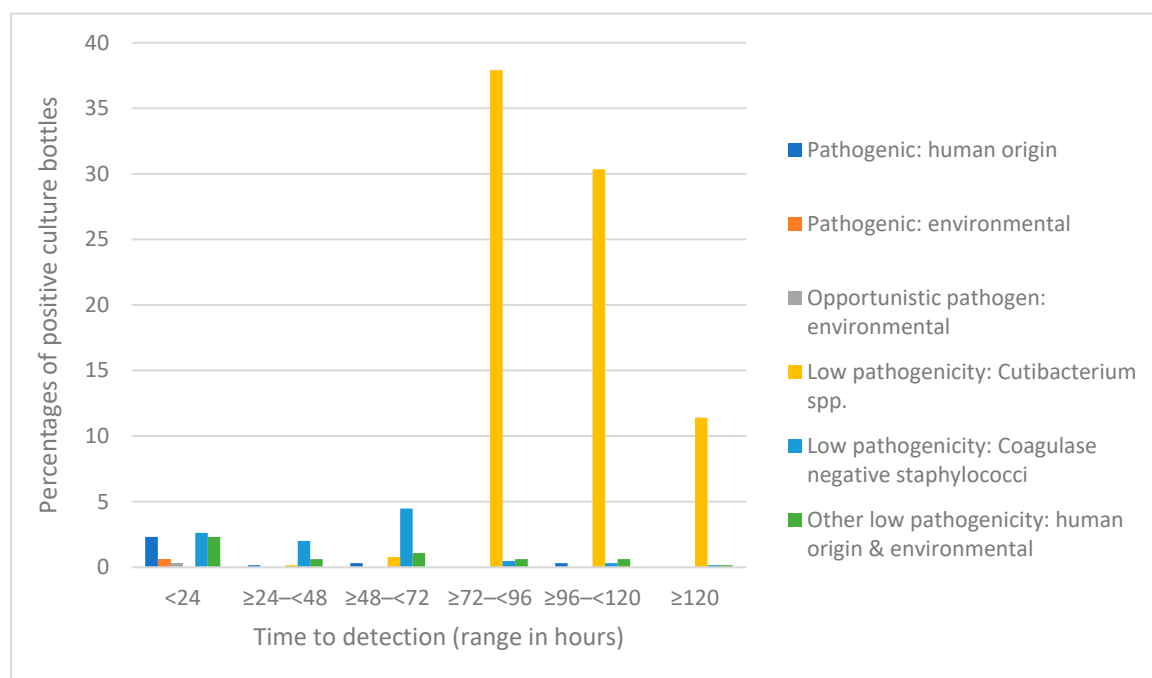

Supplement: s1 [file s1]
